# Supplementary material for: Superior efficacy of cotreatment with BET protein inhibitor and BCL2 or MCL1 inhibitor against AML blast progenitor cells
Source: PubMed Central journal article supplement (PMC6333829; doi:10.1038/s41408-018-0165-5), 2019-01-15

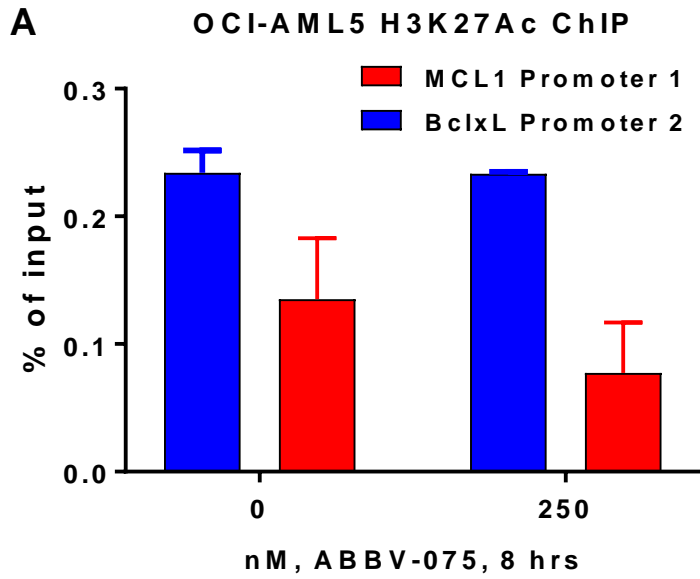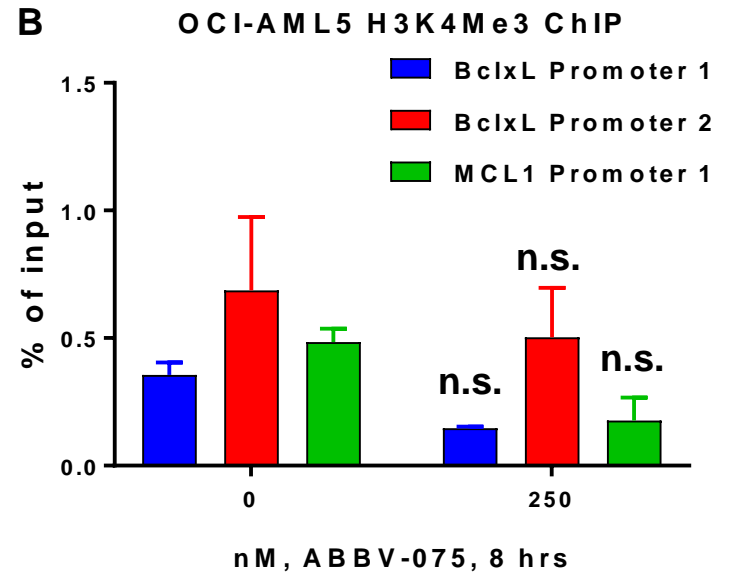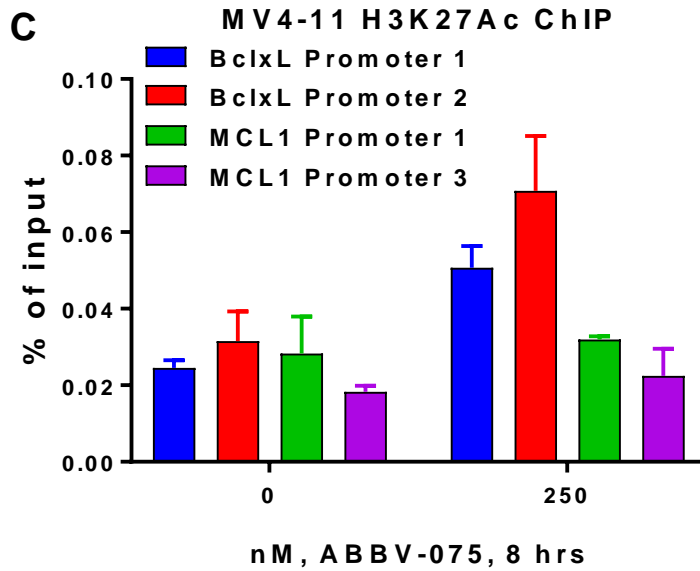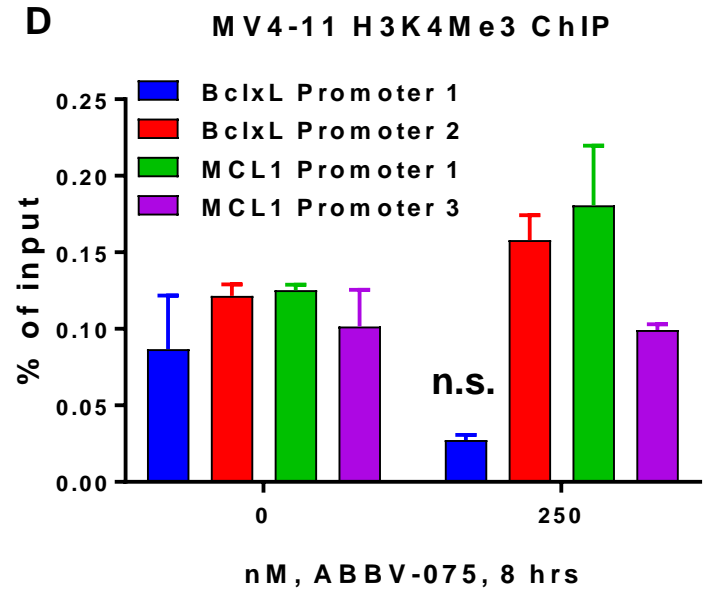

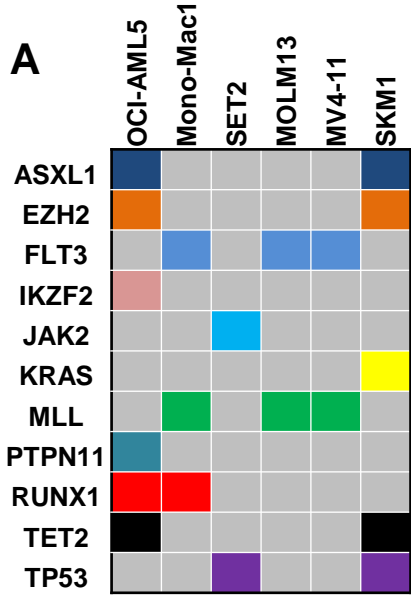

**B**

MV4-11

Control 250 nM ABBV-075

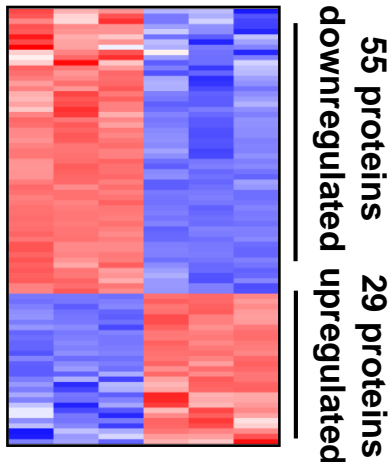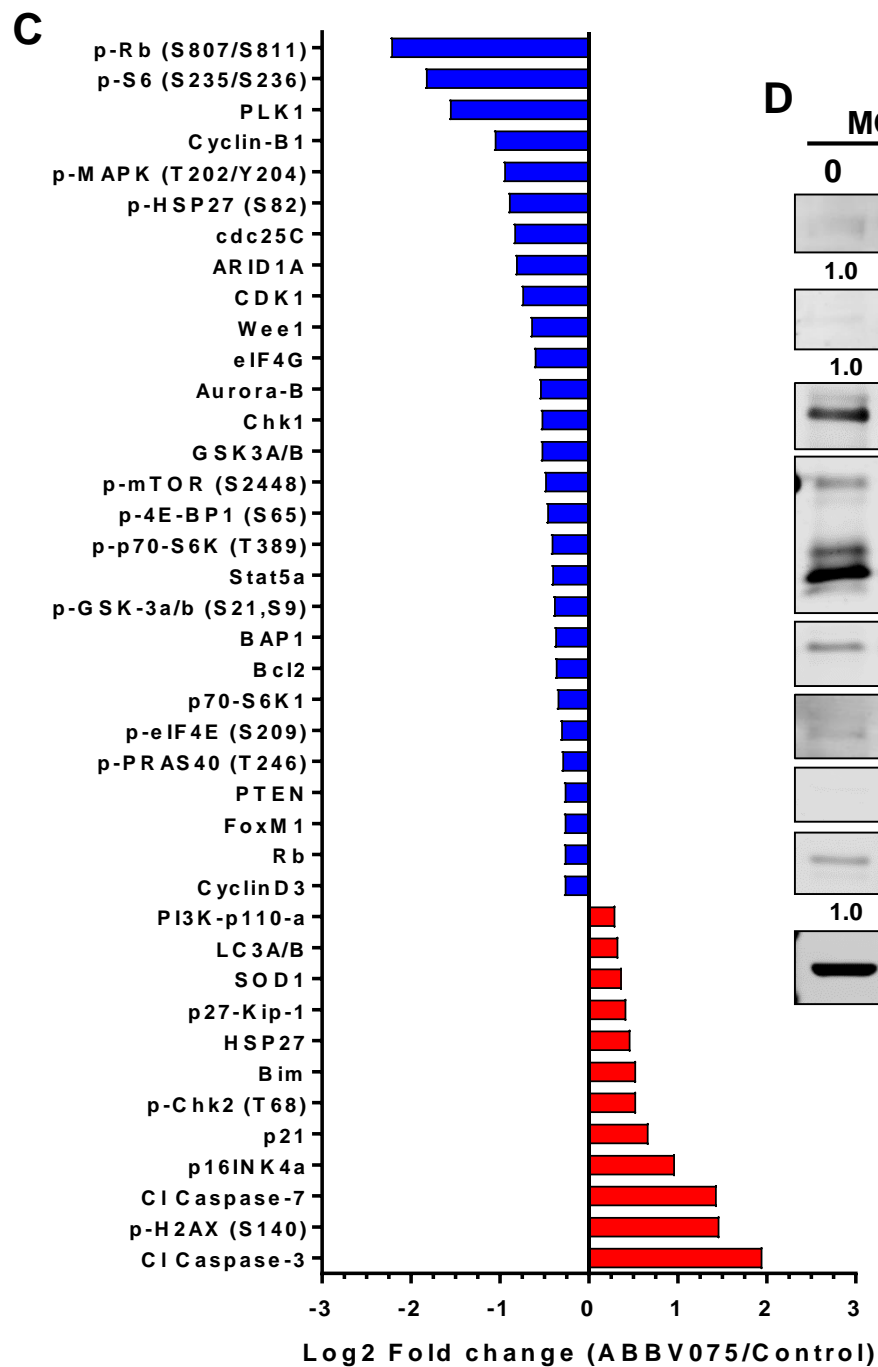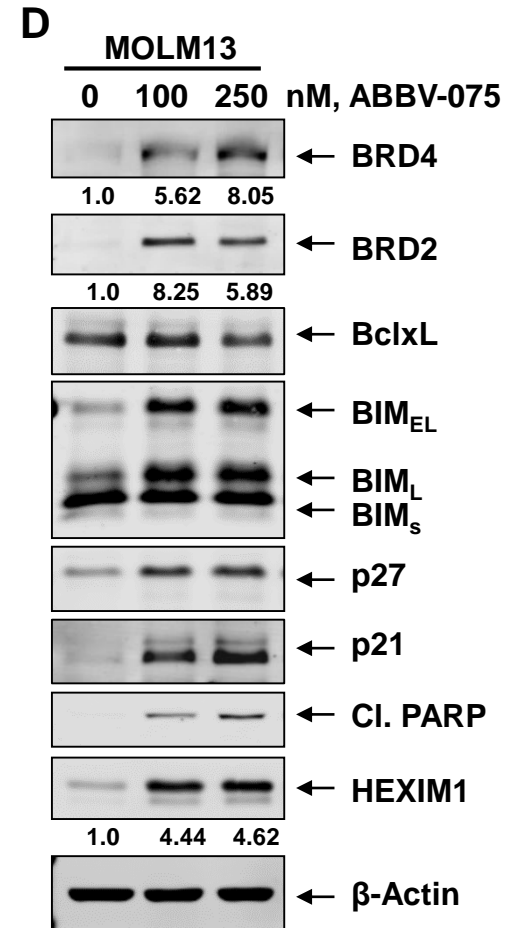

**Figure S3**

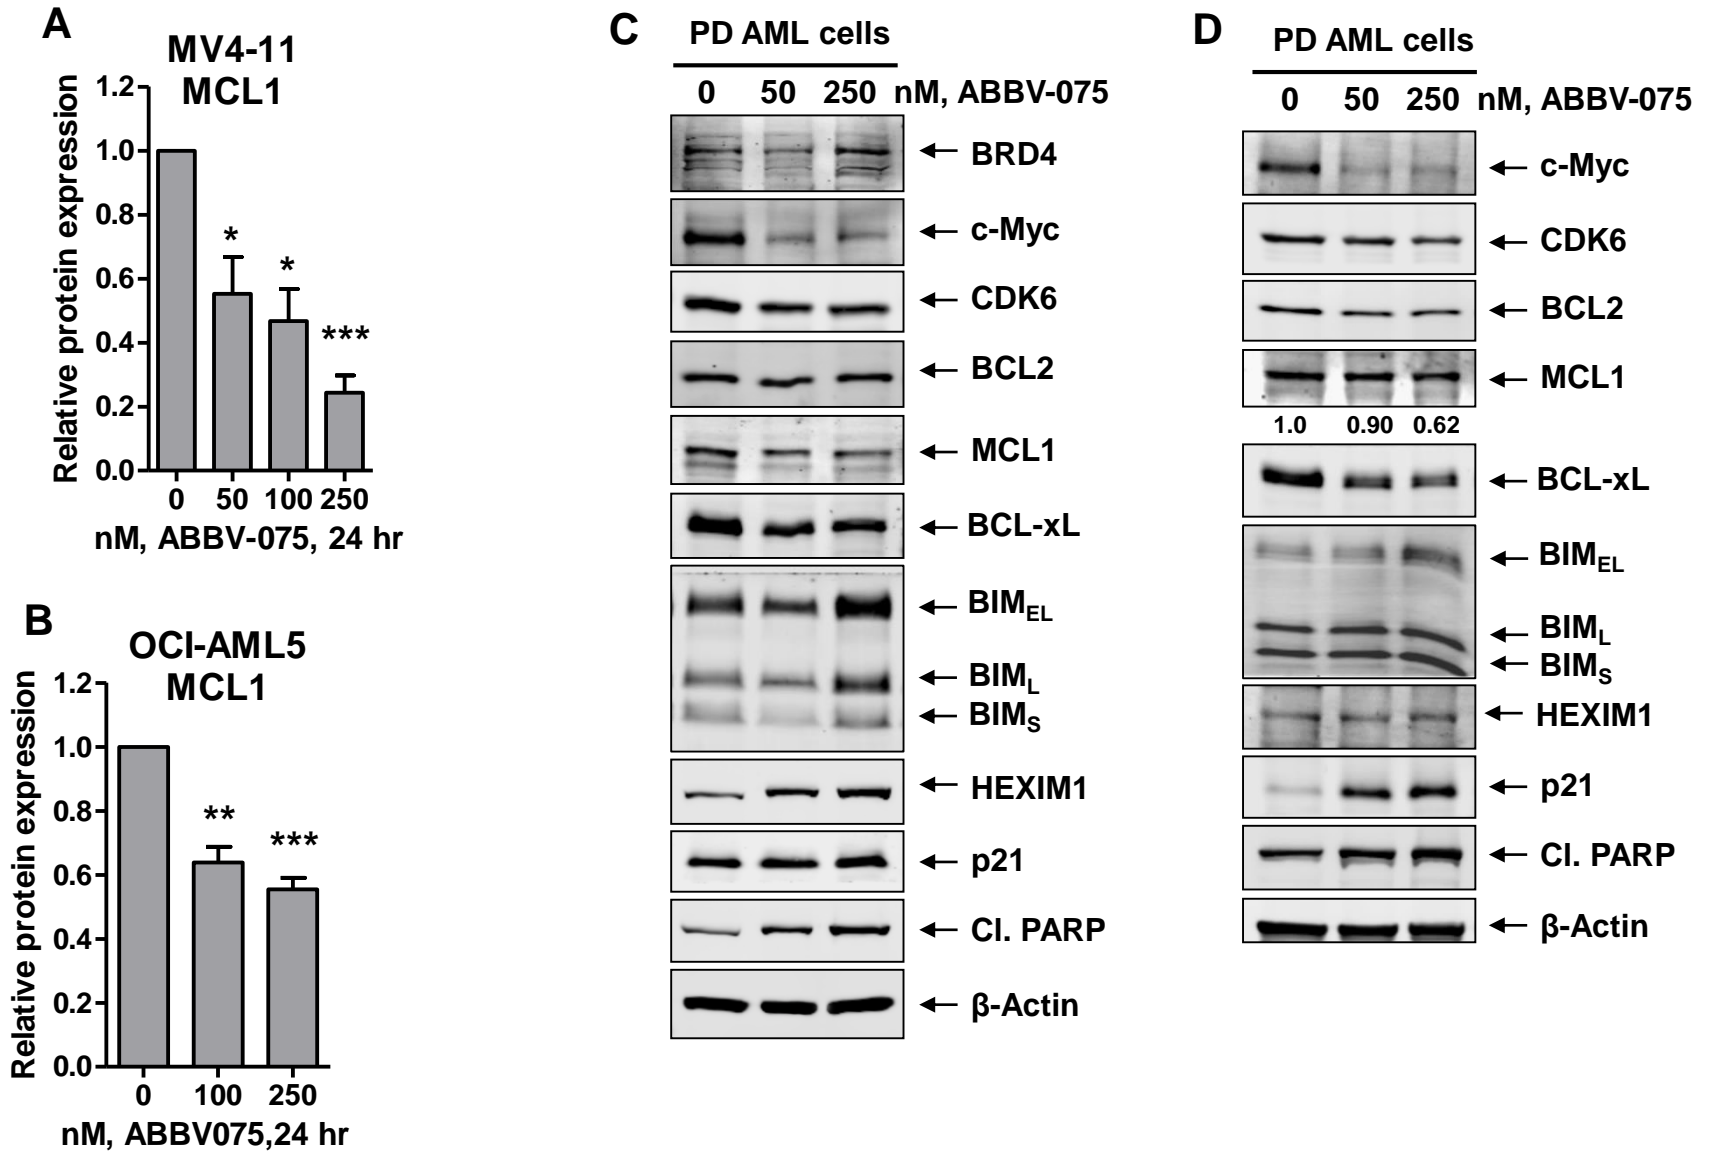

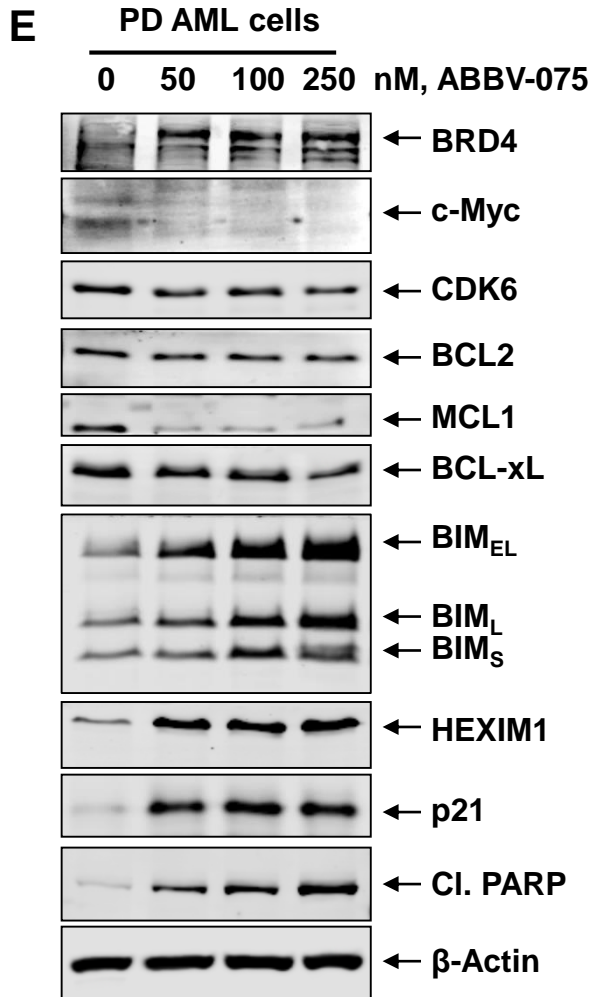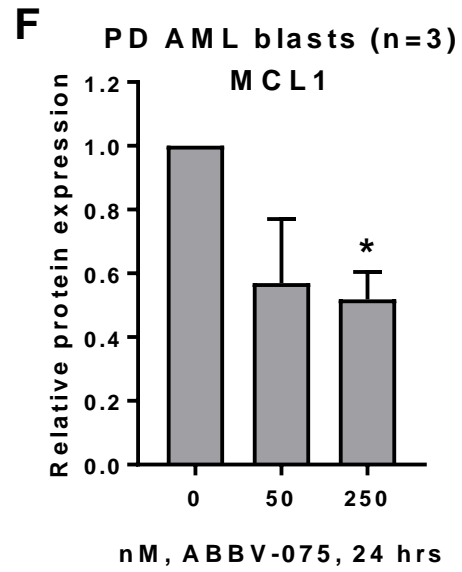

Figure S3

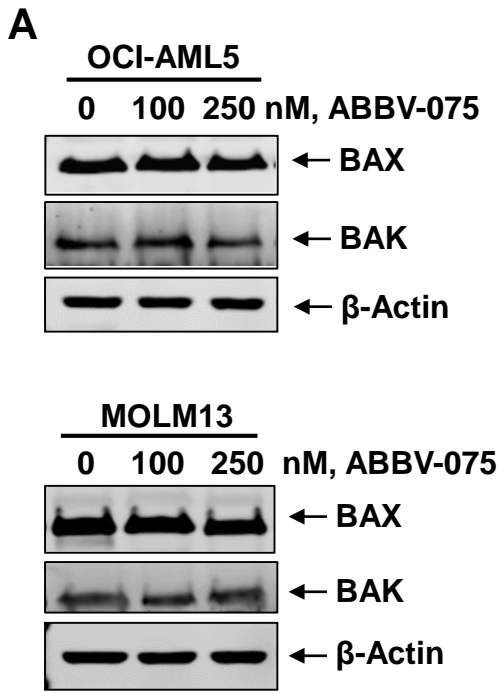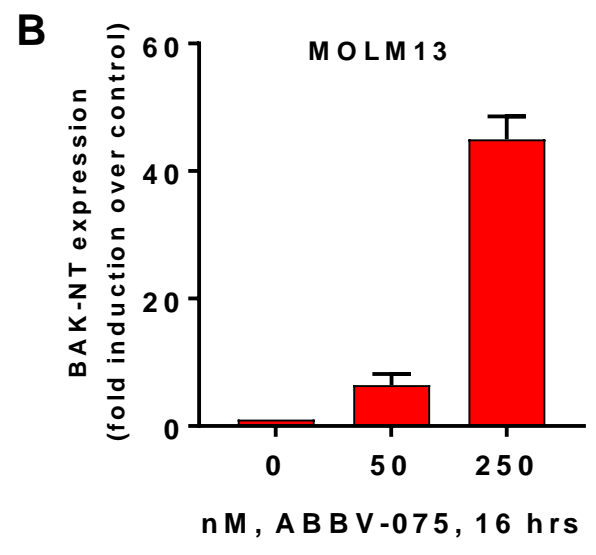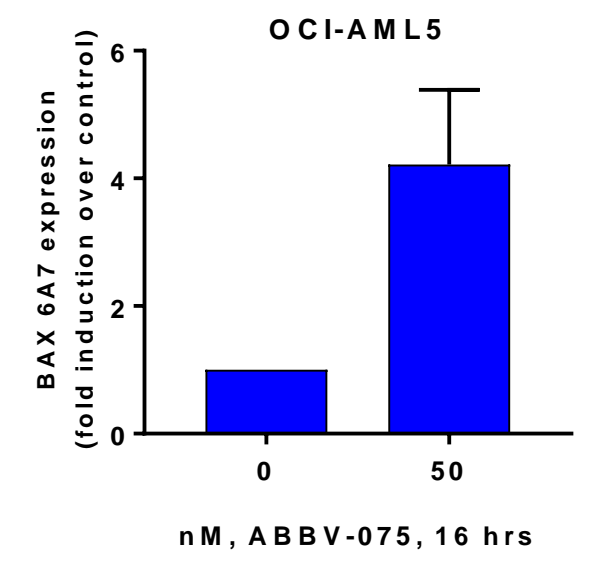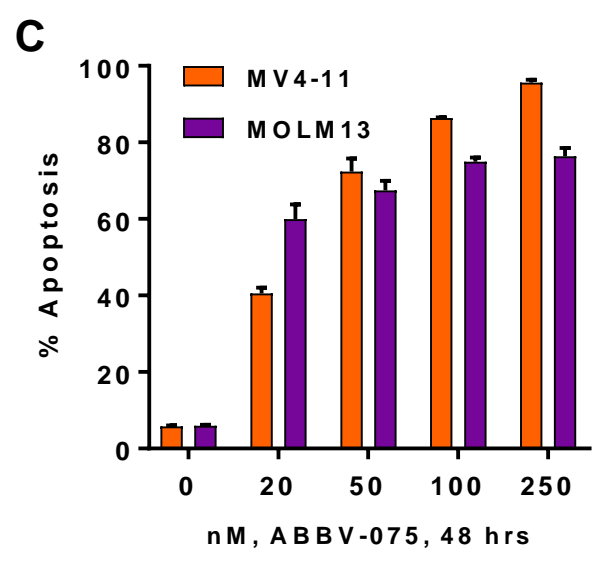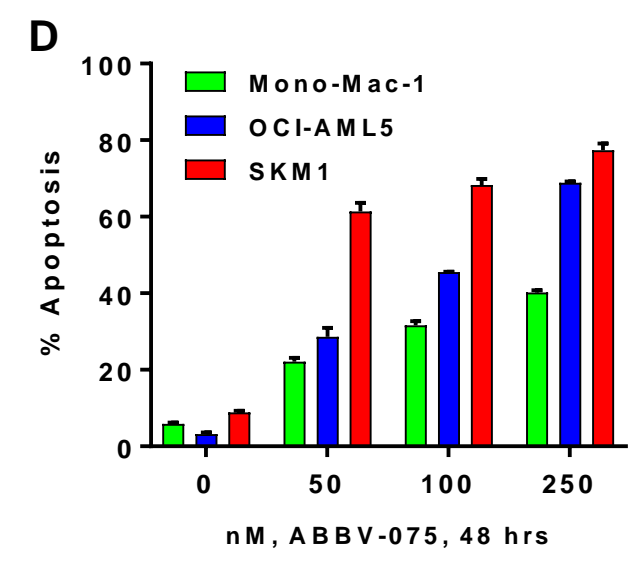

Figure S4

**Figure S4**

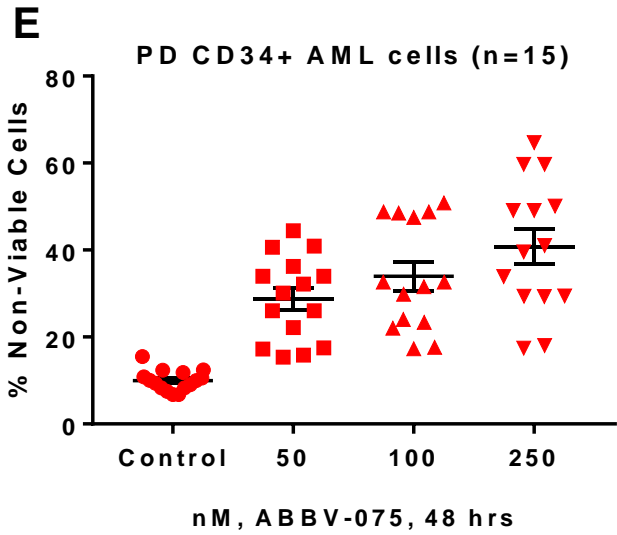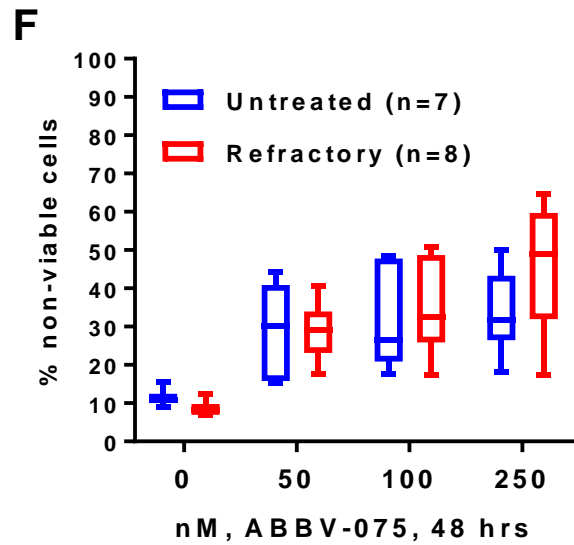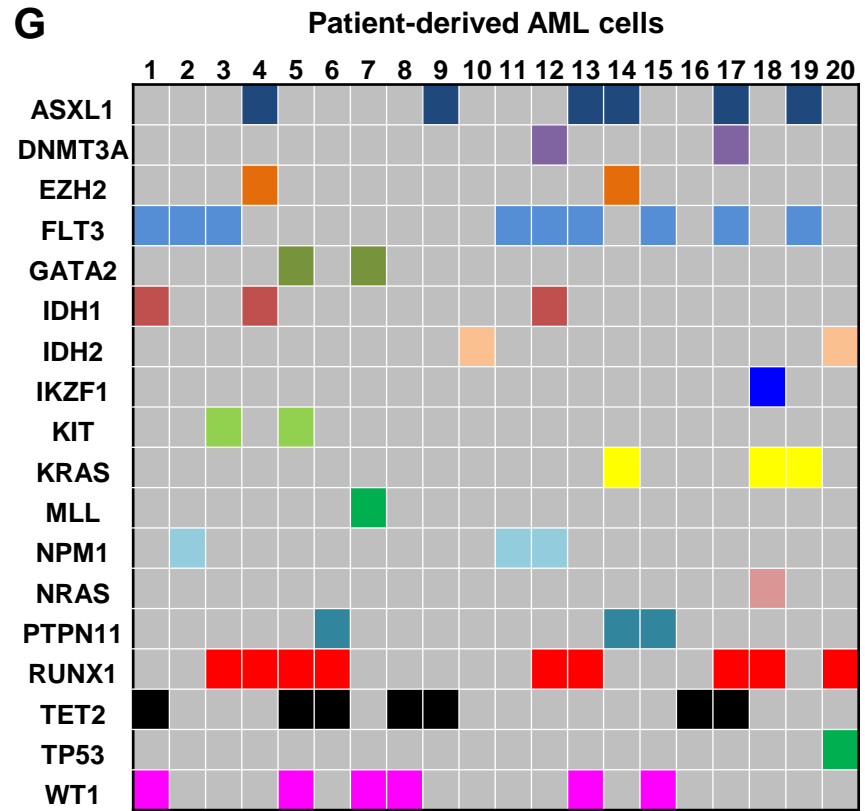

Figure S5

A

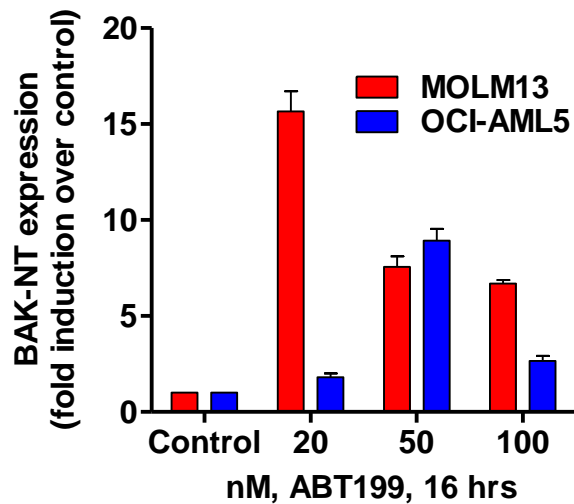

B

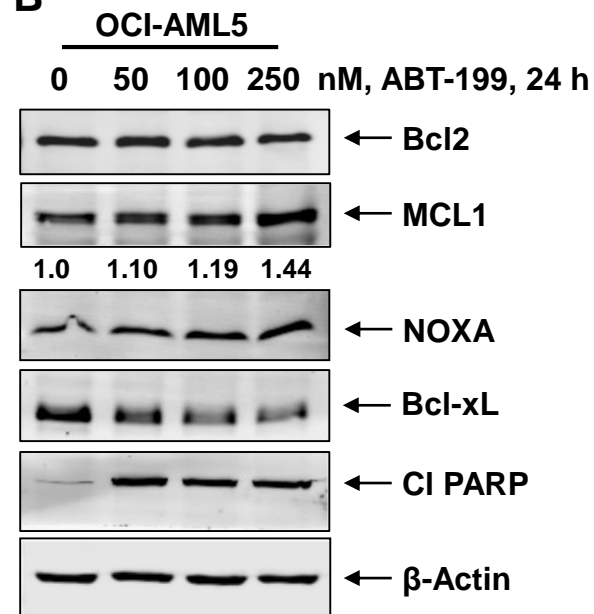

C

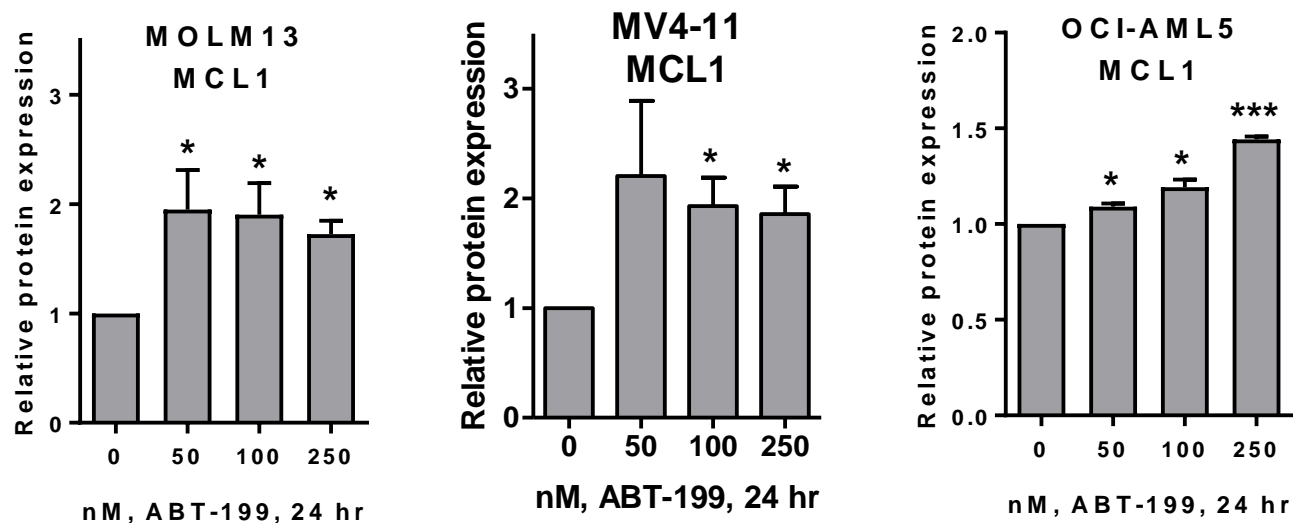

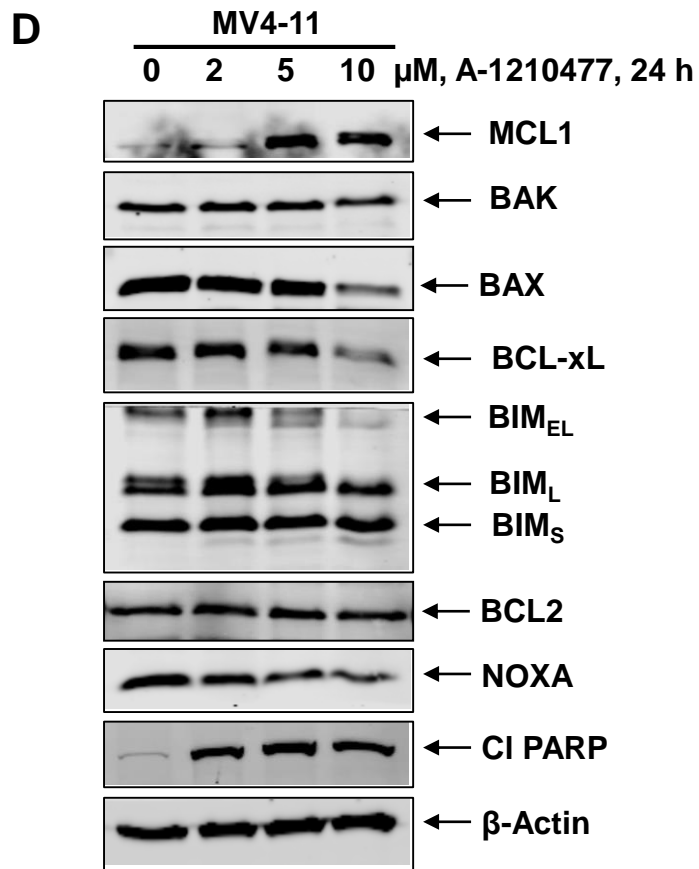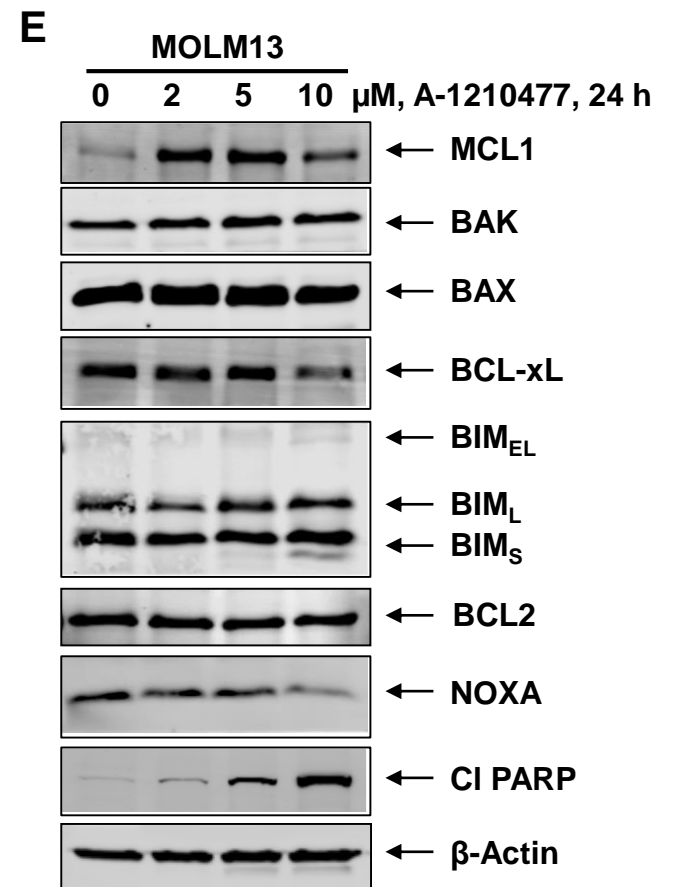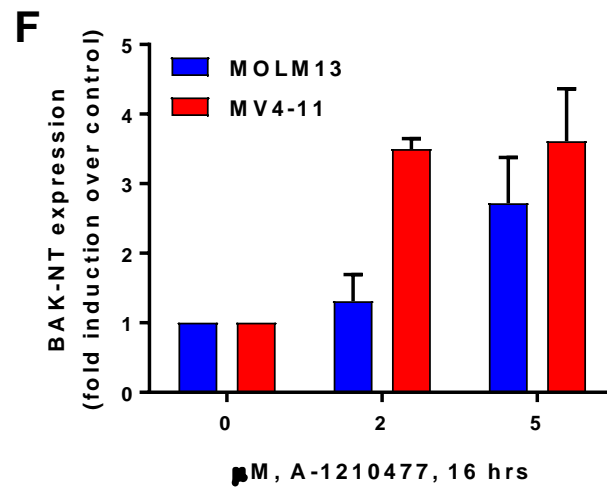

Figure S5



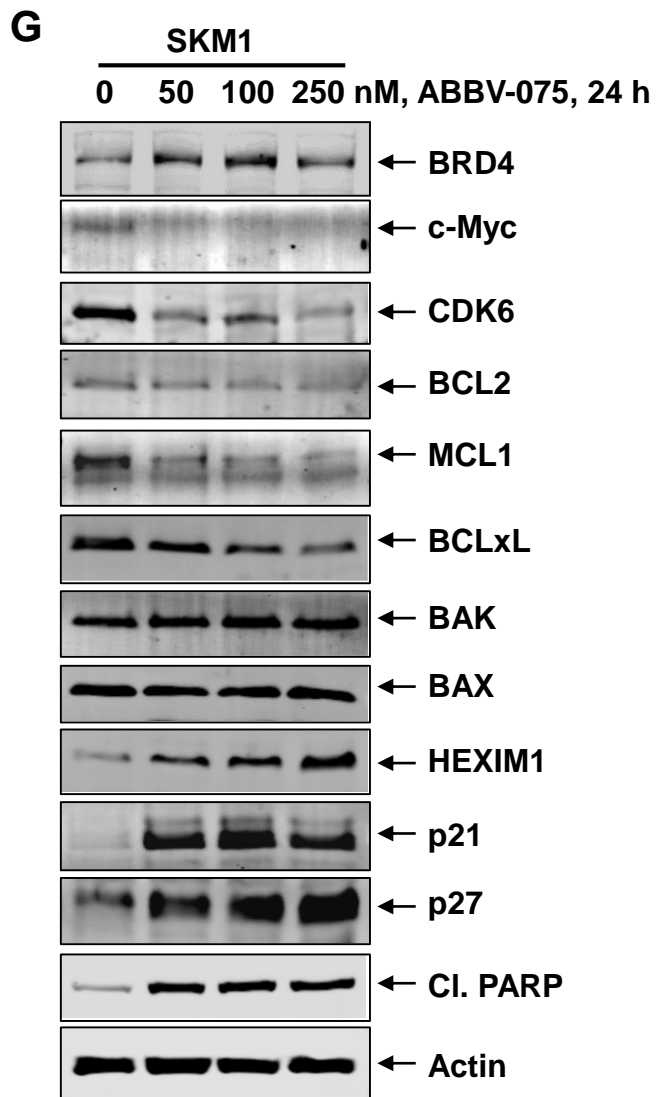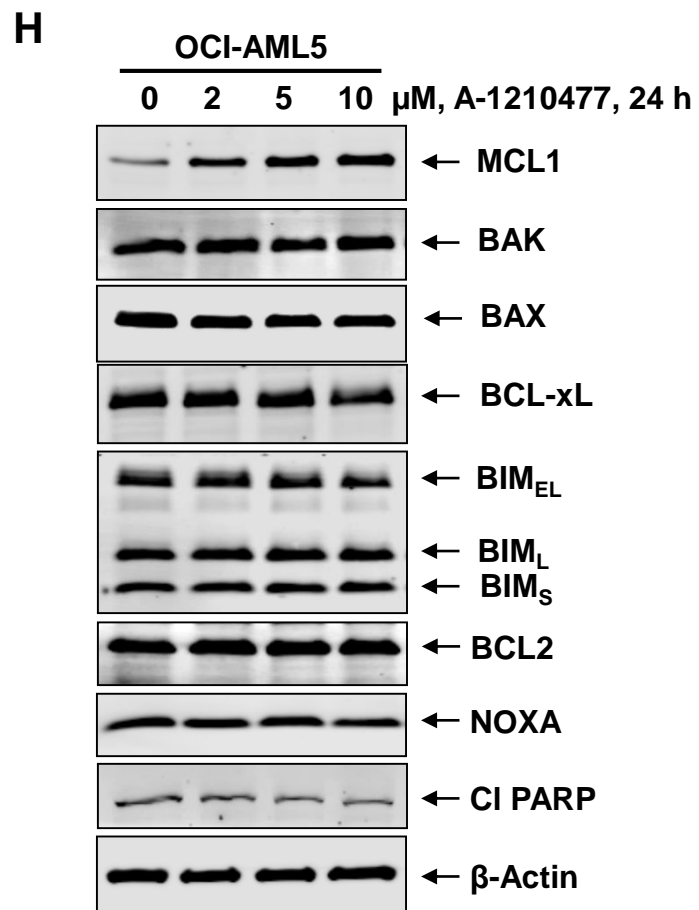

Figure S5

**Figure S6****A**

| <u>MV4-11</u> |              |        |         |
|---------------|--------------|--------|---------|
| ABBV-075 (nM) | ABT-199 (nM) | Effect | CI      |
| 10.0          | 20.0         | 0.594  | 0.39211 |
| 10.0          | 50.0         | 0.715  | 0.30182 |
| 10.0          | 100.0        | 0.8455 | 0.20539 |
| 20.0          | 20.0         | 0.8475 | 0.40478 |
| 20.0          | 50.0         | 0.889  | 0.33971 |
| 20.0          | 100.0        | 0.929  | 0.26833 |

**B**

| <u>MOLM13</u> |              |        |         |
|---------------|--------------|--------|---------|
| ABBV-075 (nM) | ABT-199 (nM) | Effect | CI      |
| 50.0          | 20.0         | 0.534  | 0.33727 |
| 50.0          | 50.0         | 0.568  | 0.30983 |
| 50.0          | 100.0        | 0.6975 | 0.15305 |
| 100.0         | 20.0         | 0.5915 | 0.48407 |
| 100.0         | 50.0         | 0.6795 | 0.31280 |
| 100.0         | 100.0        | 0.8015 | 0.14621 |

**C**

| <u>OCI-AML5</u> |              |       |          |
|-----------------|--------------|-------|----------|
| ABBV-075 (nM)   | ABT-199 (nM) | Fa    | CI Value |
| 50              | 50           | 0.691 | 0.27842  |
| 60              | 60           | 0.729 | 0.26517  |
| 70              | 70           | 0.722 | 0.32281  |
| 75              | 75           | 0.714 | 0.36310  |
| 80              | 80           | 0.702 | 0.41661  |
| 90              | 90           | 0.702 | 0.46869  |
| 100             | 100          | 0.712 | 0.49005  |

**D**

| <u>SKM1</u>   |              |        |          |
|---------------|--------------|--------|----------|
| ABBV-075 (nM) | ABT-199 (nM) | Fa     | CI Value |
| 20.0          | 100.0        | 0.3305 | 0.42311  |
| 50.0          | 100.0        | 0.548  | 0.32541  |
| 100.0         | 100.0        | 0.669  | 0.34624  |
| 20.0          | 200.0        | 0.376  | 0.35094  |
| 50.0          | 200.0        | 0.6305 | 0.21596  |
| 100.0         | 200.0        | 0.7505 | 0.21389  |

Figure S7

A

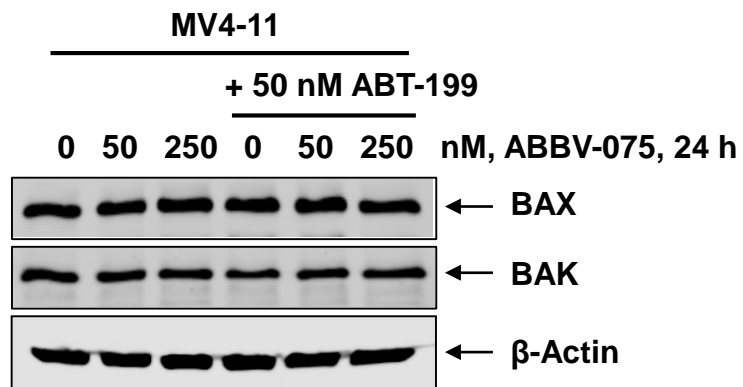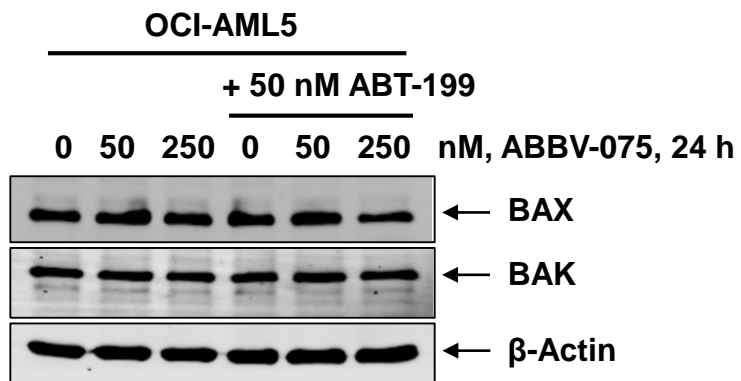

B

| <b>MOLM13</b>                            |                          |           |                 |
|------------------------------------------|--------------------------|-----------|-----------------|
| <b>A-1210477<br/>(<math>\mu</math>M)</b> | <b>ABBV-075<br/>(nM)</b> | <b>Fa</b> | <b>CI Value</b> |
| 0.5                                      | 20.0                     | 0.7088    | 0.27393         |
| 0.5                                      | 50.0                     | 0.7355    | 0.43366         |
| 0.5                                      | 100.0                    | 0.8841    | 0.14612         |
| 1.0                                      | 20.0                     | 0.7727    | 0.24572         |
| 1.0                                      | 50.0                     | 0.8214    | 0.25577         |
| 1.0                                      | 100.0                    | 0.8909    | 0.17157         |
| 2.0                                      | 20.0                     | 0.9186    | 0.13651         |
| 2.0                                      | 50.0                     | 0.9257    | 0.13851         |
| 2.0                                      | 100.0                    | 0.9278    | 0.15428         |
| 5.0                                      | 20.0                     | 0.9123    | 0.34715         |
| 5.0                                      | 50.0                     | 0.9193    | 0.33870         |
| 5.0                                      | 100.0                    | 0.9383    | 0.28344         |

**C**

| <u>OCI-AML5</u>         |                  |        |          |
|-------------------------|------------------|--------|----------|
| A-1210477<br>( $\mu$ M) | ABBV-075<br>(nM) | Fa     | CI Value |
| 0.5                     | 50.0             | 0.219  | 0.73280  |
| 0.5                     | 100.0            | 0.3845 | 0.72301  |
| 0.5                     | 250.0            | 0.7181 | 0.52313  |
| 1.0                     | 50.0             | 0.2682 | 0.57865  |
| 1.0                     | 100.0            | 0.4257 | 0.62173  |
| 1.0                     | 250.0            | 0.6402 | 0.71792  |
| 2.0                     | 50.0             | 0.3713 | 0.37986  |
| 2.0                     | 100.0            | 0.5283 | 0.43200  |
| 2.0                     | 250.0            | 0.7522 | 0.44816  |
| 5.0                     | 50.0             | 0.4971 | 0.24116  |
| 5.0                     | 100.0            | 0.6007 | 0.33300  |
| 5.0                     | 250.0            | 0.7584 | 0.43510  |
| 10.0                    | 50.0             | 0.5802 | 0.17943  |
| 10.0                    | 100.0            | 0.7117 | 0.21513  |
| 10.0                    | 250.0            | 0.8346 | 0.28625  |

**D**

| <u>MV4-11</u>           |                  |        |          |
|-------------------------|------------------|--------|----------|
| A-1210477<br>( $\mu$ M) | ABBV-075<br>(nM) | Fa     | CI Value |
| 1.0                     | 10.0             | 0.8552 | 0.11331  |
| 1.0                     | 20.0             | 0.9124 | 0.07116  |
| 1.0                     | 50.0             | 0.9247 | 0.06649  |
| 2.0                     | 10.0             | 0.8528 | 0.22334  |
| 2.0                     | 20.0             | 0.9442 | 0.09085  |
| 2.0                     | 50.0             | 0.9493 | 0.08562  |
| 5.0                     | 10.0             | 0.9693 | 0.13312  |
| 5.0                     | 20.0             | 0.9737 | 0.11685  |
| 5.0                     | 50.0             | 0.9815 | 0.08697  |

**E**

| <u>SKM1</u>             |                  |        |          |
|-------------------------|------------------|--------|----------|
| A-1210477<br>( $\mu$ M) | ABBV-075<br>(nM) | Fa     | CI Value |
| 2.0                     | 20.0             | 0.5    | 0.25028  |
| 5.0                     | 50.0             | 0.5788 | 0.21821  |
| 2.0                     | 100.0            | 0.6489 | 0.16344  |
| 5.0                     | 20.0             | 0.6747 | 0.02231  |
| 5.0                     | 50.0             | 0.7055 | 0.03459  |
| 5.0                     | 100.0            | 0.7742 | 0.02108  |
| 10.0                    | 20.0             | 0.8225 | 0.00155  |
| 10.0                    | 50.0             | 0.8793 | 8.67E-4  |
| 10.0                    | 100.0            | 0.9123 | 5.33E-4  |

**Figure S7**

Figure S7

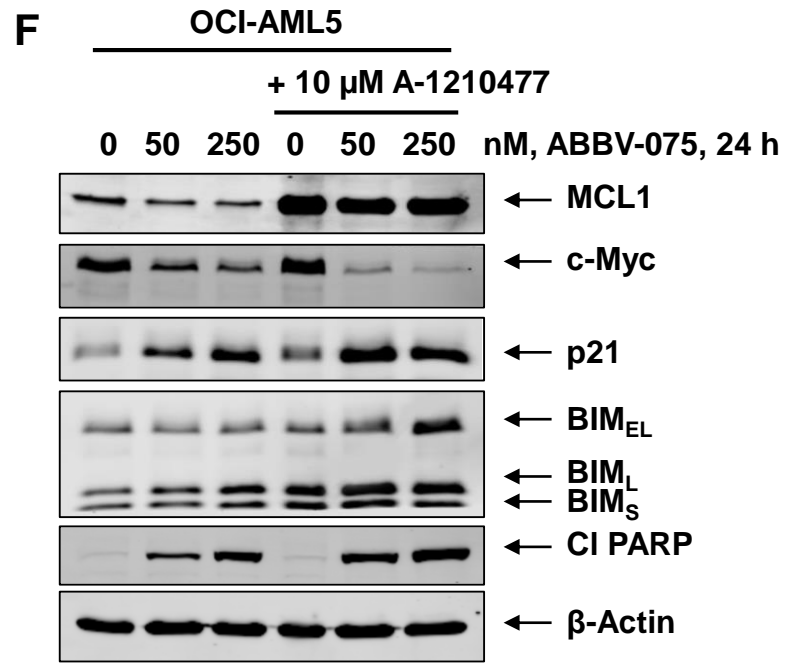

**Figure S8****A**

| <u>MV4-11</u>                  |                |        |         |
|--------------------------------|----------------|--------|---------|
| A-1210477<br>( $\mu\text{M}$ ) | ABT199<br>(nM) | Effect | CI      |
| 0.5                            | 20.0           | 0.9411 | 0.01271 |
| 1.0                            | 20.0           | 0.975  | 0.01108 |
| 2.0                            | 20.0           | 0.9786 | 0.01920 |
| 0.5                            | 50.0           | 0.969  | 0.00692 |
| 1.0                            | 50.0           | 0.9785 | 0.00970 |
| 2.0                            | 50.0           | 0.9818 | 0.01661 |

| <u>OCI-AML5</u>                |                |        |         |
|--------------------------------|----------------|--------|---------|
| A-1210477<br>( $\mu\text{M}$ ) | ABT199<br>(nM) | Effect | CI      |
| 2.0                            | 20.0           | 0.6965 | 0.19045 |
| 5.0                            | 20.0           | 0.818  | 0.08889 |
| 10.0                           | 20.0           | 0.8686 | 0.05740 |
| 2.0                            | 50.0           | 0.7784 | 0.29386 |
| 5.0                            | 50.0           | 0.8387 | 0.18839 |
| 10.0                           | 50.0           | 0.9251 | 0.07065 |

| <u>MOLM13</u>                  |                |         |         |
|--------------------------------|----------------|---------|---------|
| A-1210477<br>( $\mu\text{M}$ ) | ABT199<br>(nM) | Effect  | CI      |
| 0.5                            | 20.0           | 0.5335  | 0.11286 |
| 1.0                            | 20.0           | 0.58575 | 0.03314 |
| 2.0                            | 20.0           | 0.66135 | 0.00700 |
| 0.5                            | 50.0           | 0.5382  | 0.24749 |
| 1.0                            | 50.0           | 0.58675 | 0.07592 |
| 2.0                            | 50.0           | 0.70345 | 0.00485 |

| <u>SKM1</u>                    |                |        |          |
|--------------------------------|----------------|--------|----------|
| A-1210477<br>( $\mu\text{M}$ ) | ABT199<br>(nM) | Fa     | CI Value |
| 2.0                            | 20.0           | 0.1432 | 0.60168  |
| 5.0                            | 20.0           | 0.2244 | 0.15549  |
| 10.0                           | 20.0           | 0.301  | 0.07683  |
| 2.0                            | 50.0           | 0.1537 | 0.71382  |
| 5.0                            | 50.0           | 0.274  | 0.07107  |
| 10.0                           | 50.0           | 0.36   | 0.03297  |

Figure S8

**B**

A-1210477 and ABT-199

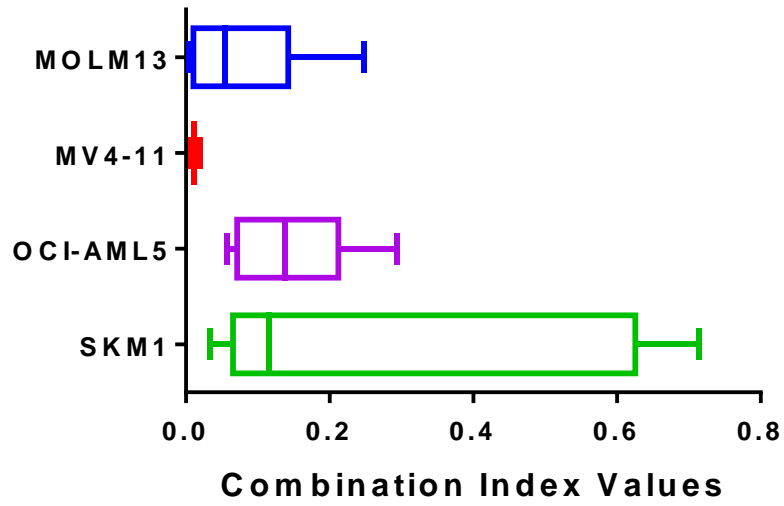

**Figure S9**

| PD CD34+ AML  |              |        |         |
|---------------|--------------|--------|---------|
| ABBV-075 (nM) | ABT-199 (nM) | Effect | CI      |
| 20.0          | 10.0         | 0.424  | 0.19660 |
| 50.0          | 10.0         | 0.398  | 0.26248 |
| 100.0         | 10.0         | 0.385  | 0.32964 |
| 250.0         | 10.0         | 0.501  | 0.09861 |
| 20.0          | 20.0         | 0.497  | 0.20108 |
| 50.0          | 20.0         | 0.489  | 0.21638 |
| 100.0         | 20.0         | 0.469  | 0.26051 |
| 250.0         | 20.0         | 0.471  | 0.25878 |

| PD CD34+ AML  |              |        |         |
|---------------|--------------|--------|---------|
| ABBV-075 (nM) | ABT-199 (nM) | Effect | CI      |
| 50.0          | 10.0         | 0.6735 | 0.36523 |
| 100.0         | 10.0         | 0.7287 | 0.20777 |
| 250.0         | 10.0         | 0.749  | 0.16593 |
| 50.0          | 20.0         | 0.8197 | 0.13496 |
| 100.0         | 20.0         | 0.7998 | 0.17790 |
| 250.0         | 20.0         | 0.8373 | 0.10356 |
| 50.0          | 50.0         | 0.8666 | 0.15737 |
| 100.0         | 50.0         | 0.8647 | 0.16297 |
| 250.0         | 50.0         | 0.891  | 0.09632 |

| PD CD34+ AML  |              |        |         |
|---------------|--------------|--------|---------|
| ABBV-075 (nM) | ABT-199 (nM) | Effect | CI      |
| 50.0          | 10.0         | 0.6729 | 0.16460 |
| 100.0         | 10.0         | 0.7745 | 0.14263 |
| 250.0         | 10.0         | 0.839  | 0.18058 |
| 50.0          | 20.0         | 0.7409 | 0.09617 |
| 100.0         | 20.0         | 0.8368 | 0.07417 |
| 250.0         | 20.0         | 0.8228 | 0.21799 |

| PD CD34+ AML  |              |        |         |
|---------------|--------------|--------|---------|
| ABBV-075 (nM) | ABT-199 (nM) | Effect | CI      |
| 20.0          | 10.0         | 0.6071 | 0.07783 |
| 50.0          | 10.0         | 0.6268 | 0.16982 |
| 100.0         | 10.0         | 0.7252 | 0.16244 |
| 20.0          | 20.0         | 0.626  | 0.06831 |
| 50.0          | 20.0         | 0.7598 | 0.06043 |
| 100.0         | 20.0         | 0.8096 | 0.07457 |

| PD CD34+ AML  |              |        |         |
|---------------|--------------|--------|---------|
| ABBV-075 (nM) | ABT-199 (nM) | Effect | CI      |
| 20.0          | 10.0         | 0.325  | 0.24874 |
| 50.0          | 10.0         | 0.3842 | 0.38171 |
| 100.0         | 10.0         | 0.4761 | 0.37597 |
| 20.0          | 20.0         | 0.3443 | 0.21128 |
| 50.0          | 20.0         | 0.4653 | 0.20398 |
| 100.0         | 20.0         | 0.6184 | 0.12649 |



**Figure S9**

| PD CD34+ AML     |                 |        |         |
|------------------|-----------------|--------|---------|
| ABBV-075<br>(nM) | ABT-199<br>(nM) | Effect | CI      |
| 50.0             | 10.0            | 0.2311 | 0.01844 |
| 100.0            | 10.0            | 0.2112 | 0.11381 |
| 250.0            | 10.0            | 0.2737 | 0.00570 |
| 50.0             | 20.0            | 0.2543 | 0.00724 |
| 100.0            | 20.0            | 0.2774 | 0.00330 |
| 250.0            | 20.0            | 0.3003 | 0.00182 |

| PD CD34+ AML     |                 |        |         |
|------------------|-----------------|--------|---------|
| ABBV-075<br>(nM) | ABT-199<br>(nM) | Effect | CI      |
| 50.0             | 10.0            | 0.9463 | 0.15088 |
| 100.0            | 10.0            | 0.9736 | 0.08590 |
| 250.0            | 10.0            | 0.9808 | 0.06700 |
| 50.0             | 20.0            | 0.9851 | 0.11007 |
| 100.0            | 20.0            | 0.9856 | 0.10720 |
| 250.0            | 20.0            | 0.9858 | 0.10605 |

| PD CD34+ AML     |                 |        |         |
|------------------|-----------------|--------|---------|
| ABBV-075<br>(nM) | ABT-199<br>(nM) | Effect | CI      |
| 50.0             | 10.0            | 0.544  | 0.09939 |
| 100.0            | 10.0            | 0.6153 | 0.04775 |
| 250.0            | 10.0            | 0.6056 | 0.05553 |
| 50.0             | 20.0            | 0.587  | 0.12594 |
| 100.0            | 20.0            | 0.6245 | 0.08519 |
| 250.0            | 20.0            | 0.6292 | 0.08260 |

| PD CD34+ AML     |                 |        |         |
|------------------|-----------------|--------|---------|
| ABBV-075<br>(nM) | ABT-199<br>(nM) | Effect | CI      |
| 50.0             | 10.0            | 0.4909 | 0.01570 |
| 50.0             | 20.0            | 0.539  | 0.00372 |
| 50.0             | 50.0            | 0.6041 | 7.14E-4 |
| 250.0            | 10.0            | 0.5228 | 0.02791 |
| 250.0            | 20.0            | 0.5639 | 0.00769 |
| 250.0            | 50.0            | 0.6532 | 4.99E-4 |

| PD CD34+ AML     |                 |        |         |
|------------------|-----------------|--------|---------|
| ABBV-075<br>(nM) | ABT-199<br>(nM) | Effect | CI      |
| 20.0             | 20.0            | 0.816  | 0.36609 |
| 50.0             | 20.0            | 0.848  | 0.29204 |
| 100.0            | 20.0            | 0.889  | 0.20457 |
| 20.0             | 50.0            | 0.848  | 0.73011 |
| 50.0             | 50.0            | 0.853  | 0.70238 |
| 100.0            | 50.0            | 0.887  | 0.52165 |

| PD CD34+ AML     |                 |        |         |
|------------------|-----------------|--------|---------|
| ABBV-075<br>(nM) | ABT-199<br>(nM) | Effect | CI      |
| 50.0             | 10.0            | 0.513  | 0.02929 |
| 100.0            | 10.0            | 0.523  | 0.02233 |
| 250.0            | 10.0            | 0.577  | 0.00652 |
| 50.0             | 20.0            | 0.556  | 0.01074 |
| 100.0            | 20.0            | 0.526  | 0.03591 |
| 250.0            | 20.0            | 0.524  | 0.04530 |

**Figure S9**

| <u>PD CD34+ AML</u> |              |        |         |
|---------------------|--------------|--------|---------|
| ABBV-075 (nM)       | ABT-199 (nM) | Effect | CI      |
| 20.0                | 10.0         | 0.536  | 0.69403 |
| 50.0                | 10.0         | 0.543  | 0.67240 |
| 100.0               | 10.0         | 0.548  | 0.65734 |
| 250.0               | 10.0         | 0.528  | 0.71954 |
| 50.0                | 20.0         | 0.679  | 0.70350 |
| 100.0               | 20.0         | 0.713  | 0.58722 |
| 250.0               | 20.0         | 0.691  | 0.66089 |

| <u>PD CD34+ AML</u> |              |        |          |
|---------------------|--------------|--------|----------|
| ABBV-075 (nM)       | ABT-199 (nM) | Effect | CI       |
| 20.0                | 10.0         | 0.573  | 0.00854  |
| 50.0                | 10.0         | 0.595  | 0.00607  |
| 100.0               | 10.0         | 0.611  | 0.00480  |
| 20.0                | 20.0         | 0.611  | 0.00136  |
| 50.0                | 20.0         | 0.701  | 9.59 E-5 |
| 100.0               | 20.0         | 0.684  | 1.74E-4  |

| <u>PD CD34+ AML</u> |              |        |         |
|---------------------|--------------|--------|---------|
| ABBV-075 (nM)       | ABT-199 (nM) | Effect | CI      |
| 10.0                | 20.0         | 0.491  | 0.03297 |
| 20.0                | 20.0         | 0.517  | 0.02904 |
| 50.0                | 20.0         | 0.543  | 0.03200 |
| 100.0               | 20.0         | 0.59   | 0.02717 |
| 250.0               | 20.0         | 0.613  | 0.04146 |
| 10.0                | 50.0         | 0.539  | 0.03932 |
| 20.0                | 50.0         | 0.61   | 0.01745 |
| 50.0                | 50.0         | 0.634  | 0.01590 |
| 100.0               | 50.0         | 0.66   | 0.01478 |
| 250.0               | 50.0         | 0.663  | 0.02470 |

| <u>PD CD34+ AML</u> |              |        |         |
|---------------------|--------------|--------|---------|
| ABBV-075 (nM)       | ABT-199 (nM) | Effect | CI      |
| 20.0                | 10.0         | 0.268  | 0.38760 |
| 50.0                | 10.0         | 0.362  | 0.50415 |
| 100.0               | 10.0         | 0.473  | 0.54426 |
| 20.0                | 20.0         | 0.519  | 0.08776 |
| 50.0                | 20.0         | 0.539  | 0.19357 |
| 100.0               | 20.0         | 0.605  | 0.26960 |

**Figure S10**

| <u>PD CD34+ AML</u>     |                  |        |         |
|-------------------------|------------------|--------|---------|
| A-1210477<br>( $\mu$ M) | ABBV-075<br>(nM) | Effect | CI      |
| 2.0                     | 20.0             | 0.3964 | 0.40621 |
| 2.0                     | 50.0             | 0.4118 | 0.52400 |
| 2.0                     | 100.0            | 0.4698 | 0.25387 |
| 5.0                     | 20.0             | 0.5997 | 0.15391 |
| 5.0                     | 50.0             | 0.5831 | 0.17009 |
| 5.0                     | 100.0            | 0.6047 | 0.15184 |
| 10.0                    | 20.0             | 0.8064 | 0.08141 |
| 10.0                    | 50.0             | 0.8467 | 0.05646 |
| 10.0                    | 100.0            | 0.8633 | 0.04746 |

| <u>PD CD34+ AML</u>     |                  |        |         |
|-------------------------|------------------|--------|---------|
| A-1210477<br>( $\mu$ M) | ABBV-075<br>(nM) | Effect | CI      |
| 2.0                     | 20.0             | 0.4276 | 0.03706 |
| 2.0                     | 50.0             | 0.3913 | 0.23960 |
| 2.0                     | 100.0            | 0.4312 | 0.04199 |
| 5.0                     | 20.0             | 0.3879 | 0.23930 |
| 5.0                     | 50.0             | 0.4397 | 0.07770 |
| 5.0                     | 100.0            | 0.4492 | 0.06985 |
| 10.0                    | 20.0             | 0.5337 | 0.05430 |
| 10.0                    | 50.0             | 0.5251 | 0.05964 |
| 10.0                    | 100.0            | 0.5707 | 0.03615 |

| <u>PD CD34+ AML</u>     |                  |        |         |
|-------------------------|------------------|--------|---------|
| A-1210477<br>( $\mu$ M) | ABBV-075<br>(nM) | Effect | CI      |
| 2.0                     | 20.0             | 0.2377 | 0.85025 |
| 2.0                     | 50.0             | 0.3132 | 0.43475 |
| 2.0                     | 100.0            | 0.4103 | 0.19749 |
| 5.0                     | 20.0             | 0.3409 | 0.72157 |
| 5.0                     | 50.0             | 0.3539 | 0.67026 |
| 5.0                     | 100.0            | 0.4678 | 0.27047 |
| 10.0                    | 20.0             | 0.5552 | 0.25757 |
| 10.0                    | 50.0             | 0.6390 | 0.13167 |
| 10.0                    | 100.0            | 0.6327 | 0.13983 |

| <u>PD CD34+ AML</u>     |                  |        |         |
|-------------------------|------------------|--------|---------|
| A-1210477<br>( $\mu$ M) | ABBV-075<br>(nM) | Effect | CI      |
| 2.0                     | 20.0             | 0.3584 | 0.17587 |
| 2.0                     | 50.0             | 0.360  | 0.18942 |
| 2.0                     | 100.0            | 0.4049 | 0.13566 |
| 5.0                     | 20.0             | 0.5279 | 0.17885 |
| 5.0                     | 50.0             | 0.5098 | 0.19512 |
| 5.0                     | 100.0            | 0.5285 | 0.17835 |
| 10.0                    | 20.0             | 0.751  | 0.10881 |
| 10.0                    | 50.0             | 0.7875 | 0.08499 |
| 10.0                    | 100.0            | 0.8124 | 0.07051 |

**Figure S10**

| <u>PD CD34+ AML</u>     |                  |        |          |
|-------------------------|------------------|--------|----------|
| A-1210477<br>( $\mu$ M) | ABBV-075<br>(nM) | Fa     | CI Value |
| 2.0                     | 20.0             | 0.715  | 0.42908  |
| 2.0                     | 50.0             | 0.763  | 0.50417  |
| 2.0                     | 100.0            | 0.7822 | 0.70809  |
| 5.0                     | 20.0             | 0.8225 | 0.21166  |
| 5.0                     | 50.0             | 0.8446 | 0.23253  |
| 5.0                     | 100.0            | 0.8215 | 0.48038  |
| 10.0                    | 20.0             | 0.9234 | 0.11512  |
| 10.0                    | 50.0             | 0.9177 | 0.13565  |
| 10.0                    | 100.0            | 0.8948 | 0.22494  |

**Figure S11**

| <u>PD CD34+ AML</u>     |                 |        |         |
|-------------------------|-----------------|--------|---------|
| A-1210477<br>( $\mu$ M) | ABT-199<br>(nM) | Effect | CI      |
| 2.0                     | 10.0            | 0.2857 | 0.10529 |
| 5.0                     | 10.0            | 0.39   | 0.01353 |
| 10.0                    | 10.0            | 0.604  | 3.18E-4 |
| 2.0                     | 20.0            | 0.3532 | 0.04557 |
| 5.0                     | 20.0            | 0.4189 | 0.01342 |
| 10.0                    | 20.0            | 0.6136 | 3.95E-4 |
| 2.0                     | 50.0            | 0.4041 | 0.03913 |
| 5.0                     | 50.0            | 0.5085 | 0.00549 |
| 10.0                    | 50.0            | 0.6916 | 1.56E-4 |

| <u>PD CD34+ AML cells</u> |                 |        |         |
|---------------------------|-----------------|--------|---------|
| A-1210477<br>( $\mu$ M)   | ABT-199<br>(nM) | Effect | CI      |
| 2.0                       | 10.0            | 0.2094 | 0.24978 |
| 5.0                       | 10.0            | 0.2941 | 0.32612 |
| 10.0                      | 10.0            | 0.5213 | 0.16813 |
| 2.0                       | 20.0            | 0.2286 | 0.21233 |
| 5.0                       | 20.0            | 0.3562 | 0.21855 |
| 10.0                      | 20.0            | 0.4917 | 0.19872 |
| 5.0                       | 50.0            | 0.2701 | 0.38573 |
| 5.0                       | 50.0            | 0.3619 | 0.21104 |
| 10.0                      | 50.0            | 0.5201 | 0.16928 |

| <u>PD CD34+ AML cells</u> |                 |        |         |
|---------------------------|-----------------|--------|---------|
| A-1210477<br>( $\mu$ M)   | ABT-199<br>(nM) | Effect | CI      |
| 2.0                       | 10.0            | 0.2839 | 0.08734 |
| 5.0                       | 10.0            | 0.3856 | 0.00773 |
| 10.0                      | 10.0            | 0.66   | 1.92E-5 |
| 2.0                       | 20.0            | 0.3683 | 0.02137 |
| 5.0                       | 20.0            | 0.4418 | 0.00422 |
| 10.0                      | 20.0            | 0.6568 | 3.78E-5 |
| 2.0                       | 50.0            | 0.4007 | 0.02520 |
| 5.0                       | 50.0            | 0.5291 | 0.00155 |
| 10.0                      | 50.0            | 0.7328 | 1.28E-5 |

Figure S12

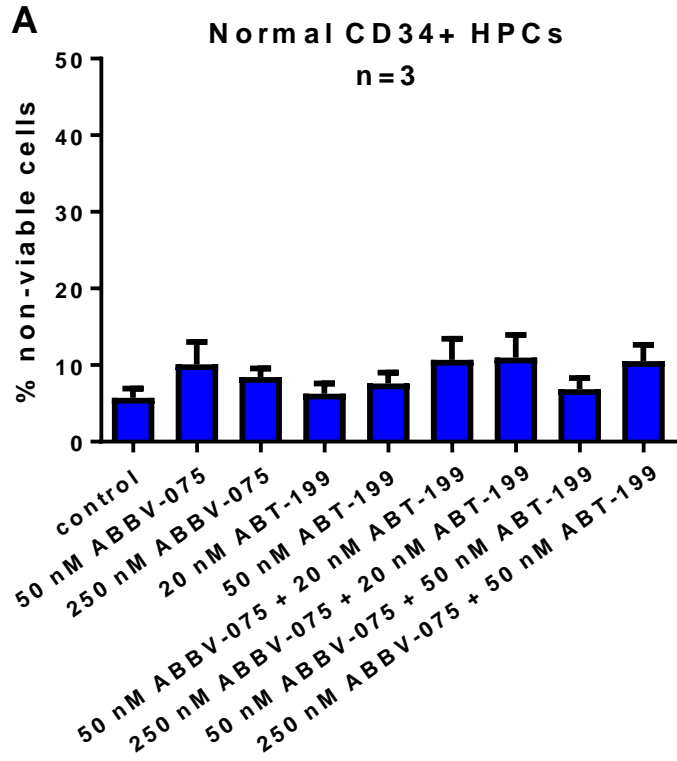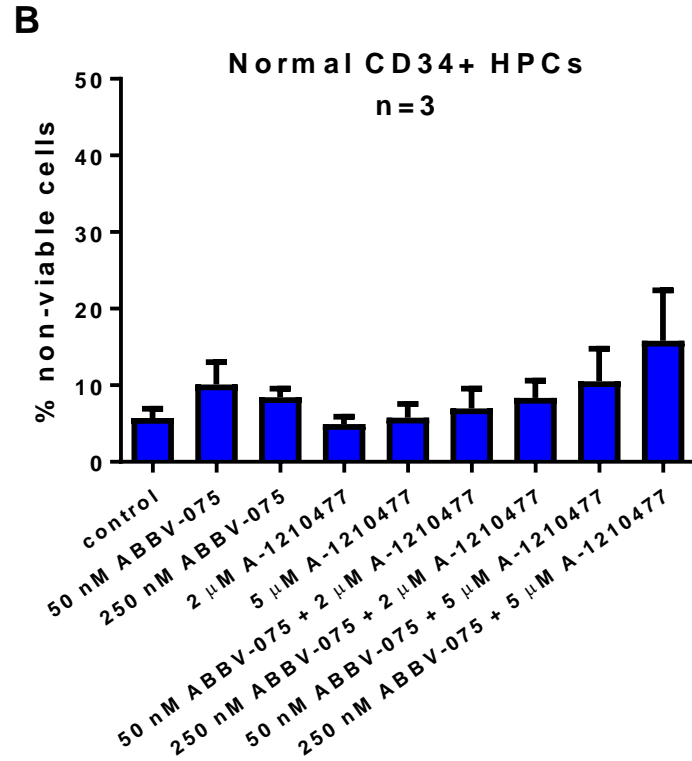

Supplement: 41408_2018_165_MOESM1_ESM.pdf [file 41408_2018_165_MOESM1_ESM.pdf]
